# Supplementary material
Source: publisher figshare collection journal article supplement (https://acs.figshare.com/ndownloader/files/29125343)
Supplement: Supplementary file 1 [file 29125343]

Supporting information

**Self assembled fluorosome-polydopamine complex for efficient tumor targeting and commingled photo-dynamic/thermal therapy of triple-negative breast cancer**

*Rajalakshmi P.S<sup>1,#</sup>, Syed Baseeruddin Alvi<sup>1,#</sup>, Nazia Begum<sup>2</sup>, Bantal Veeresh<sup>2</sup>, Aravind Kumar Rengan<sup>1,\*</sup>*

*<sup>1</sup>Department of Biomedical Engineering, Indian Institute of Technology Hyderabad, Telangana, India, 502285.*

*<sup>2</sup>Department of Pharmacology, G. Pulla Reddy College of Pharmacy, Hyderabad, Telangana, India, 500028.*

*# Authors contributed equally, \*Corresponding Author*

Email: [aravind@bme.iith.ac.in](mailto:aravind@bme.iith.ac.in)

## Figures

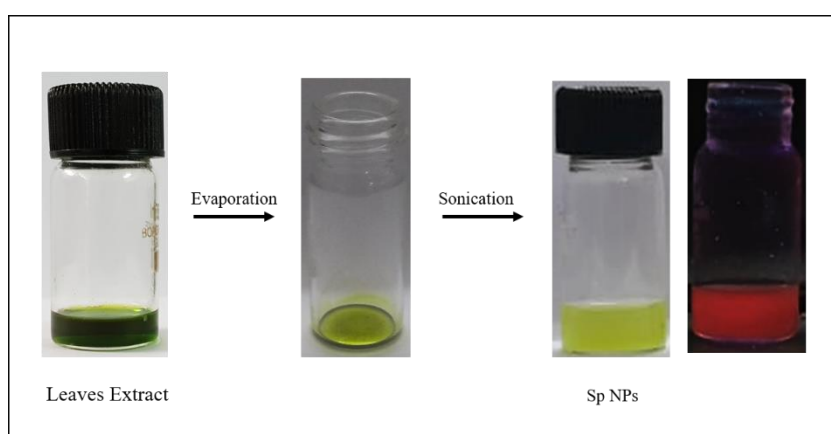

**Figure S1:** Methodolgy for the preparation of Sp NPs and the fluorescent image of the sample when excited with 365nm UV lamp.

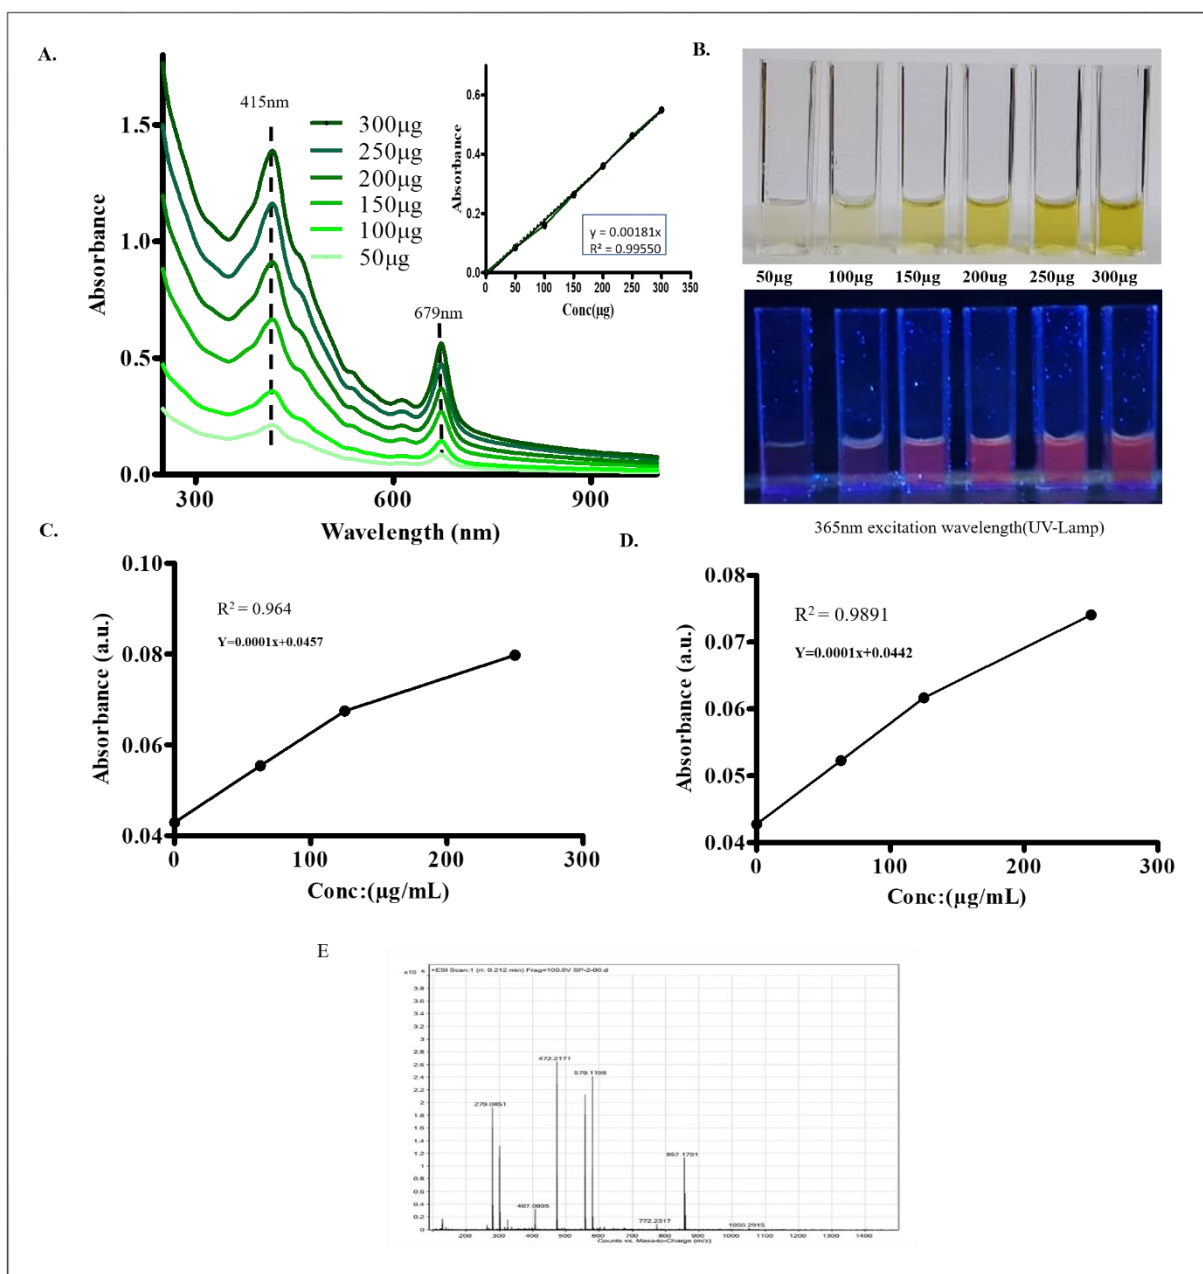

**Figure S2:** (A) Characterization of the Sp NPs by using UV-Vis Spectroscopy and the concentration dependent increase of absorbance. (B) Photograph of the cuvettes containing Sp NPs under normal light and UV light (excitation wavelength: 365nm). (C&D) The quantification of lipid in Sp NPs by taking HSPC as standard. (E) represents the HRMS data of Sp NPs.

HR-MS analysis of the lipid membrane derived from spinach leaves. It has been reported that the lipids present in spinach leaves are abundant in polyunsaturated fatty acids, as shown in **Figure S2 E**. The components having mass/charge ratio in the range of 278 was identified as  $\alpha$  linolenic acid (95% of unsaturated fatty acids).<sup>1</sup> The components having mass/charge ratio in the range of 550 to 610 are chlorophyll derivatives.<sup>2,3</sup> The components having mass/charge ratio in the range of 772 was identified as phosphatidylglycerol<sup>4</sup>. These lipids are known to be present in higher proportion in the chloroplast of the plant cell and can self-assemble to form stable structure.

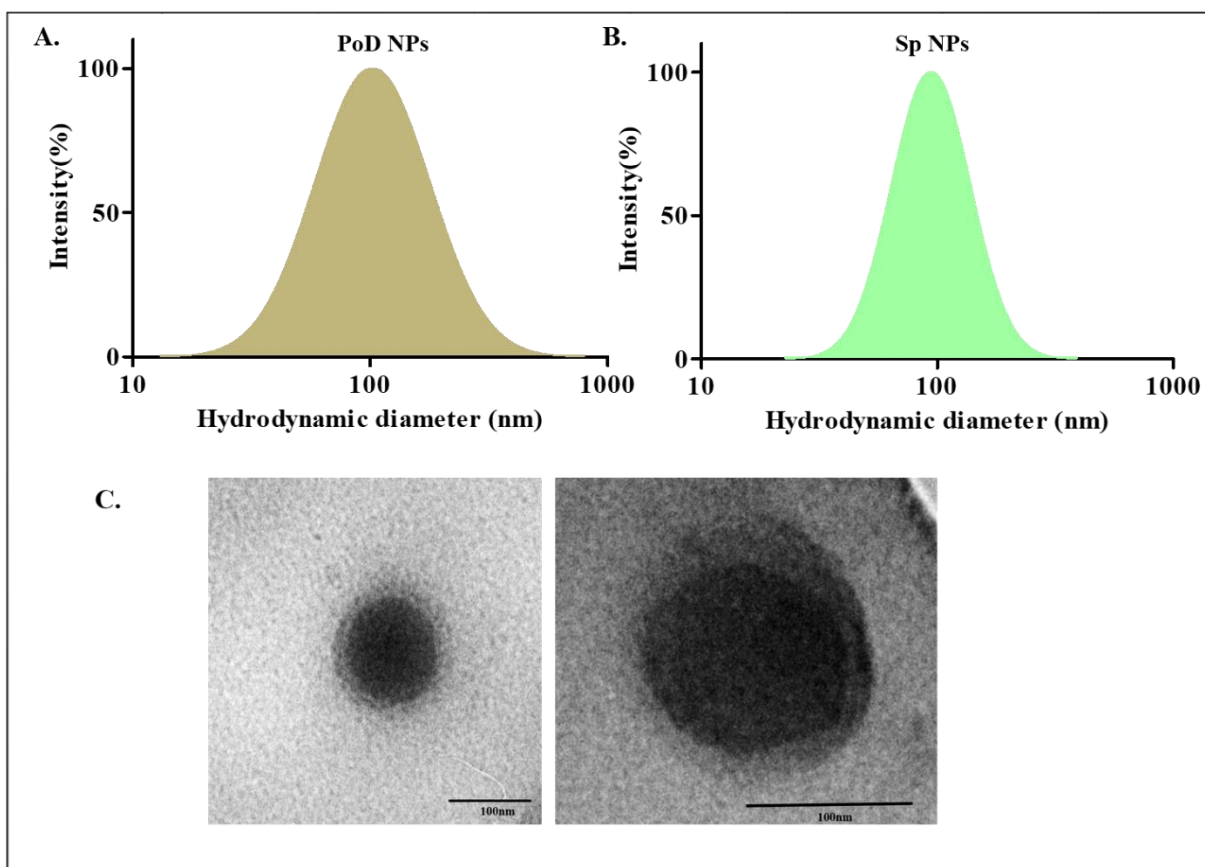

**Figure S3:** (A&B) Size analysis of PoD NPs and Sp NPs using Particle Sizing (DLS) and (C) TEM images of SPoD NPs.

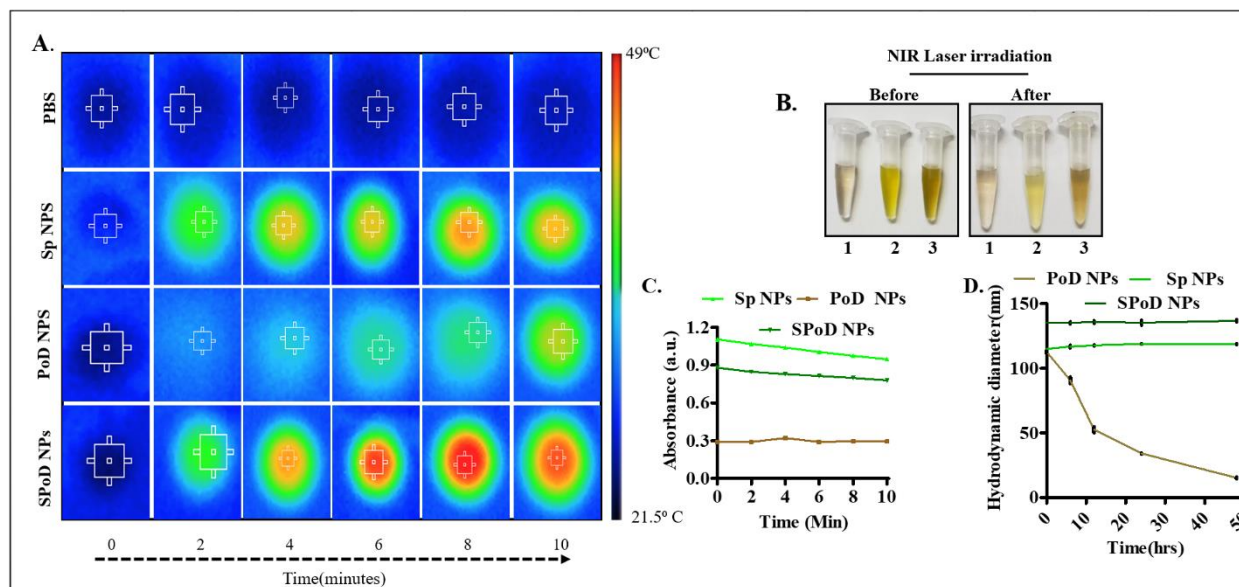

**Figure S4:** Photothermal transduction efficiency and the stability of PBS, Sp NPs, PoD NPs & SPoD NPs. (A) Thermal images after irradiating with 690nm laser for 10 minutes, ( B&C) represents the degradation of PoD NPs, Sp NPs & SPoD NPs upon laser irradiation . (D) represents the serum stability of PoD NPs, Sp NPs & SPoD NPs using Particle sizing.

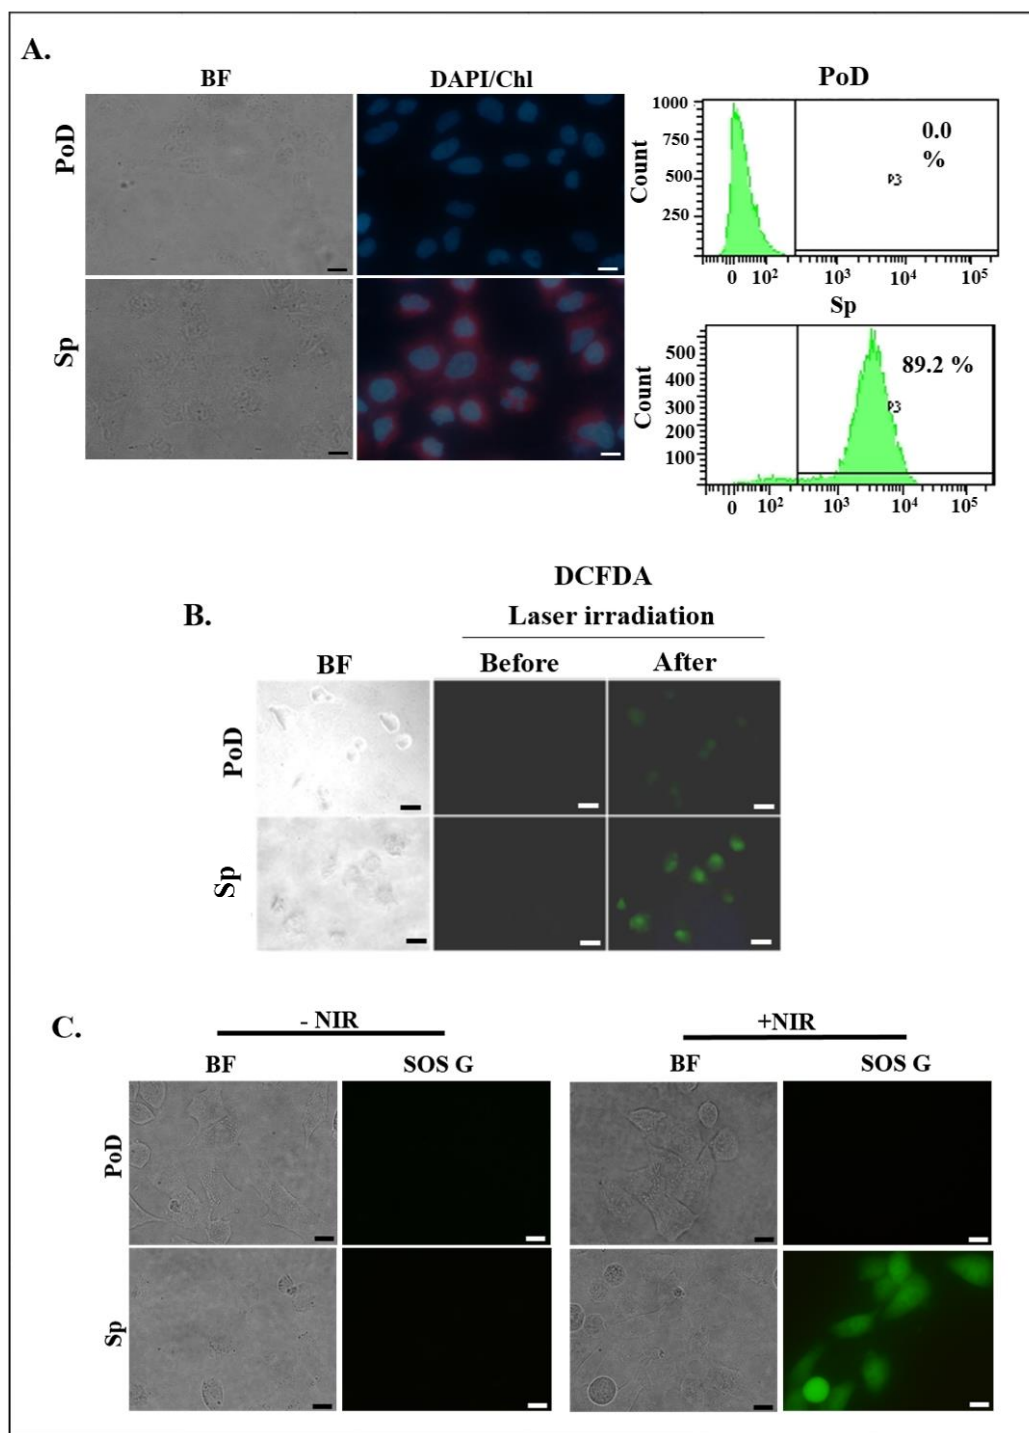

**Figure S5:** *In vitro* intracellular uptake and the NIR laser mediated intracellular ROS generation. (A) Fluorescence images showing intracellular uptake of the PoD & Sp NPs (DAPI: nuclear stain) (scale bar 20μm) and quantification of the intracellular uptake of the SPoD NPs using flow cytometry. (B) *In vitro* intracellular uptake and the NIR laser mediated intracellular ROS generation by DCFDA in PoD & Sp NPs (scale bar 100μm). (C) NIR laser mediated intracellular generation of Singlet oxygen species by using specific SOS G probe (scale bar 20μm).

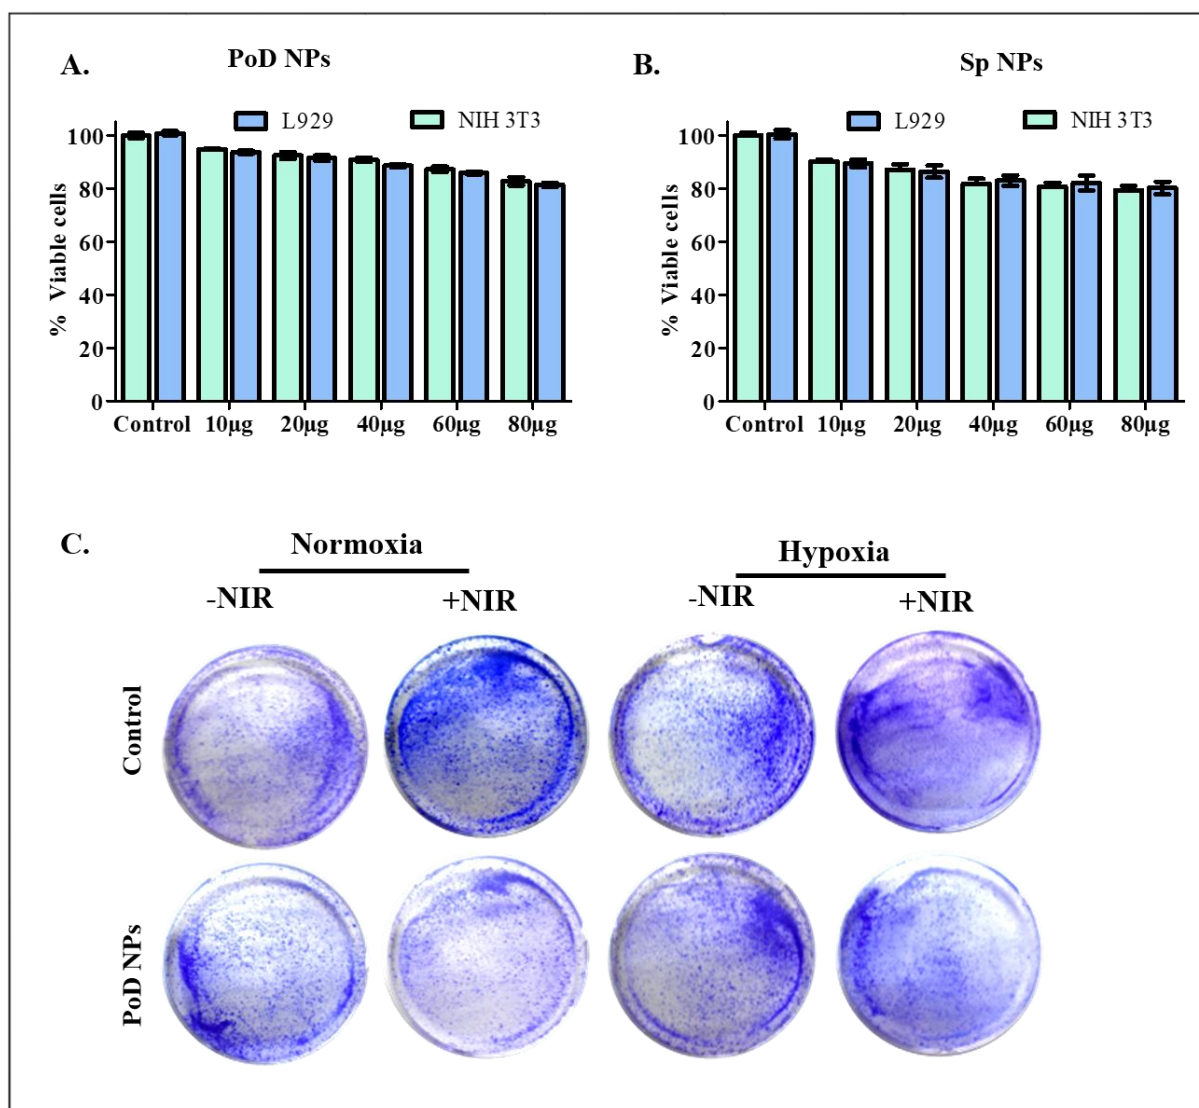

**Figure S6:** (A&B) shows the biocompatibility of the PoD NPs, Sp NPs in L929 and NIH 3T3 for 48hrs. (C) Clonogenic assay for control and PoD NPs in normoxia and hypoxia.

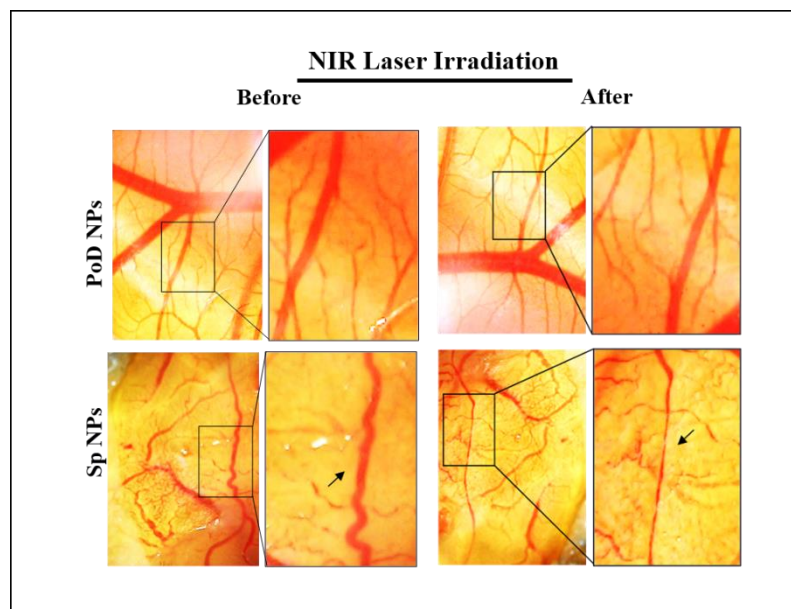

**Figure S7:** *In ovo* NIR laser mediated vascular disruption by the PoD NPs (PTT) and Sp NPs (PDT ).



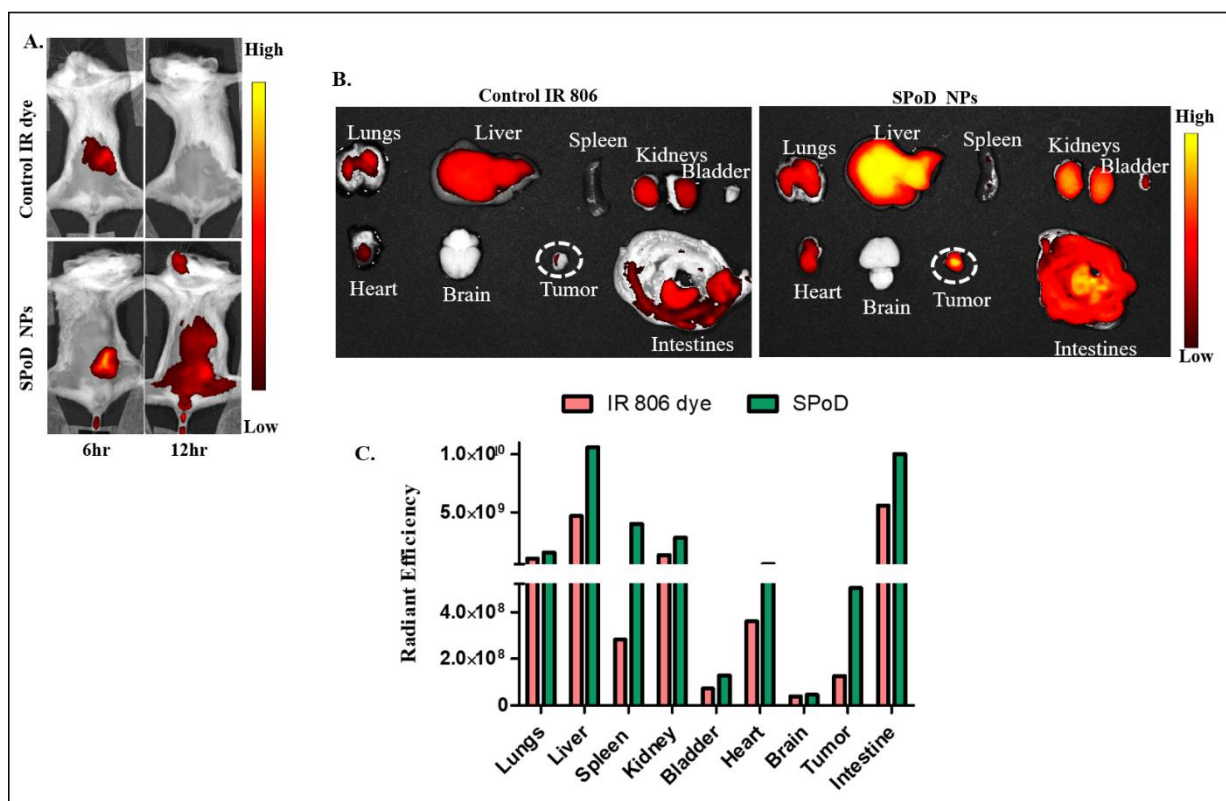

**Figure S 8:** (A) *In vivo* passive targeting of tumor by control IR 806, SPoD IR NPs evaluated using *in vivo* fluorescent imaging system, (B) the *ex vivo* imaging of control IR806, & SPoD NPs. (C) Graphical representation of biodistribution of the control IR806, & SPoD NPs.

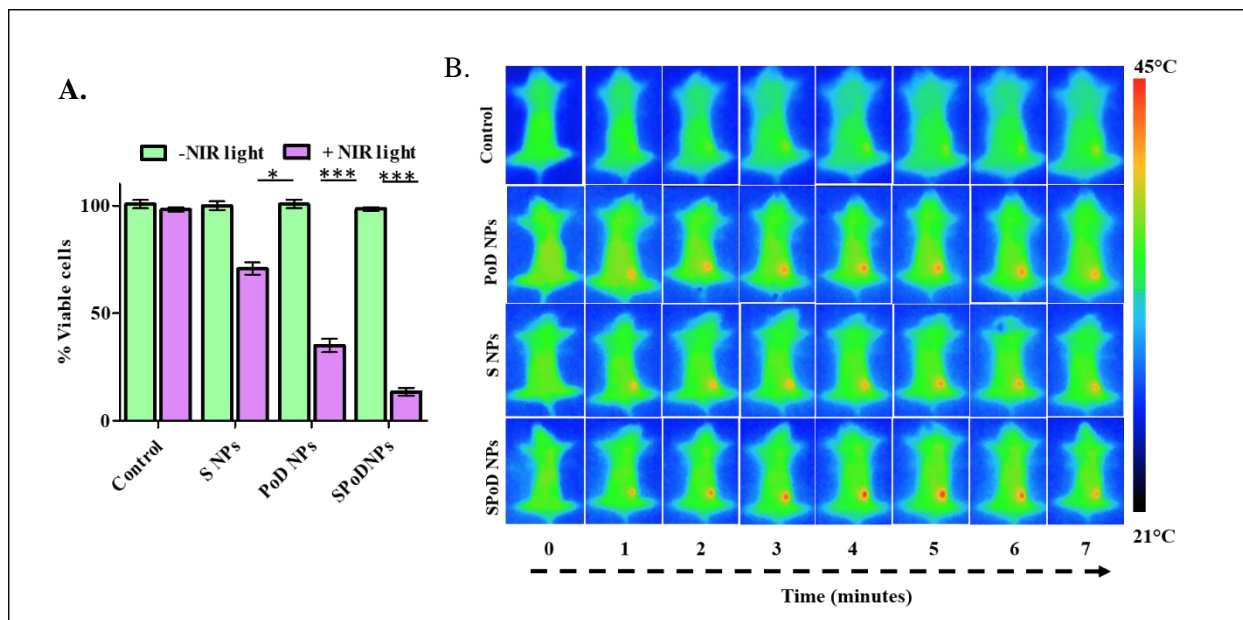

**Figure S9:** (A) Laser mediated cytotoxicity in 4T1 cell lines and (B ) *In vivo* thermal imaging

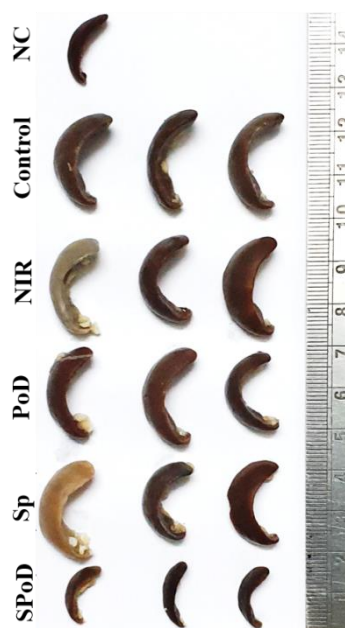

**Figure S10:** *Ex vivo* images of spleen

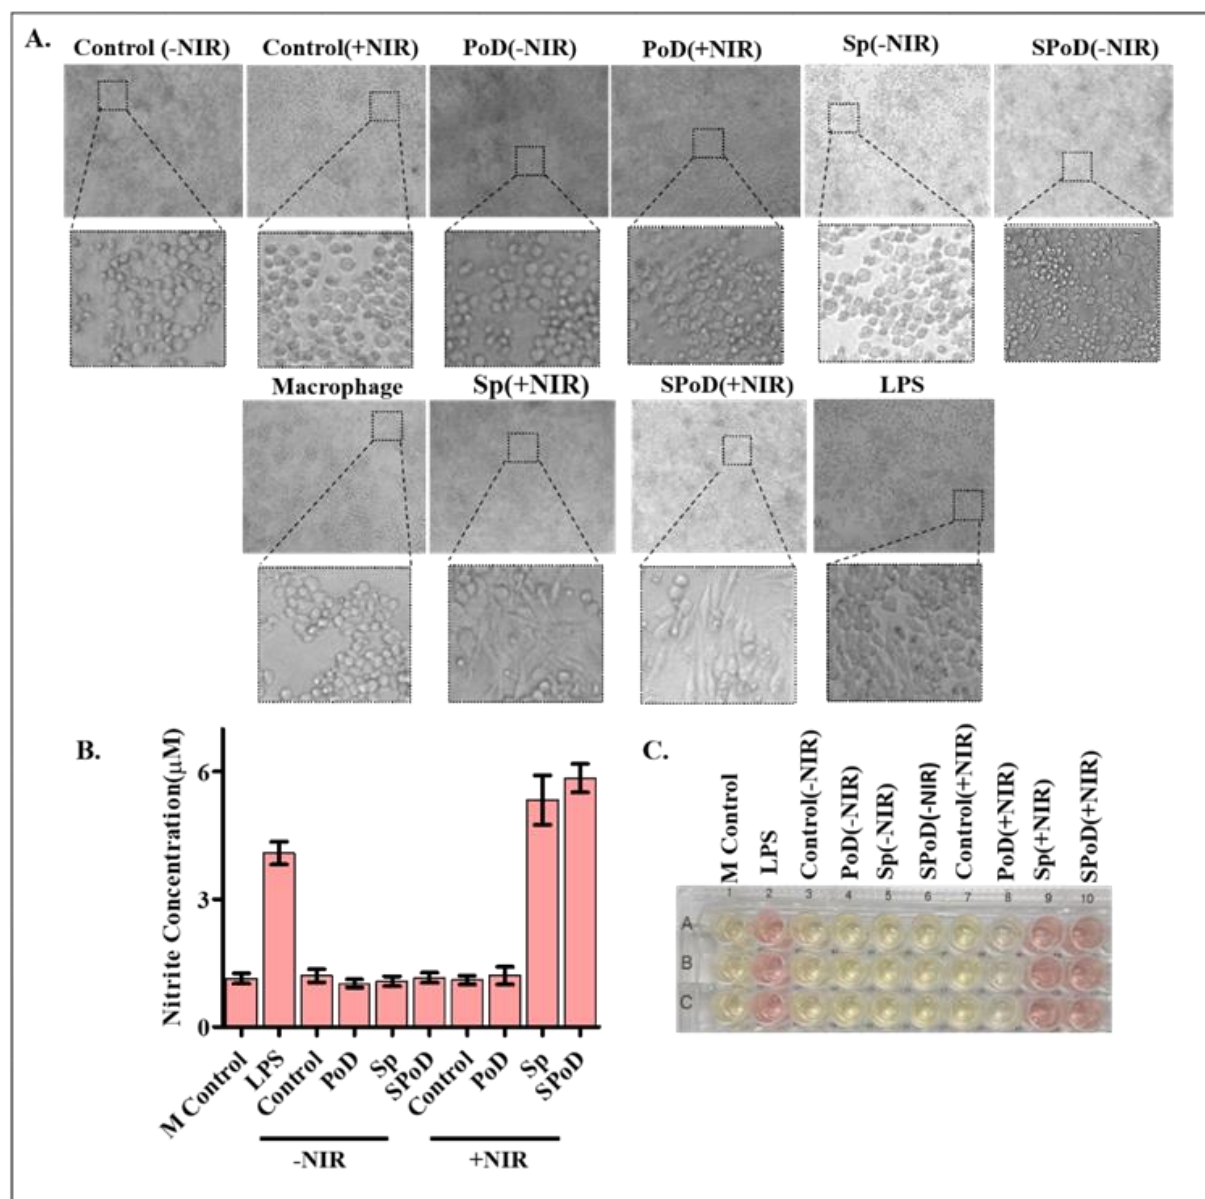

**Figure S11:**(A)The morphological changes in the monocyte-macrophage cell line (Raw264) after treating it with the NIR irradiated supernatant of the cancer cell. (B & C) represents the Nitrite concentration produced by the monocyte-macrophage cell line (Raw264.1) due to the activation of the cells.

## References

1. Wang, R.; Furumoto, T.; Motoyama, K.; Okazaki, K.; Kondo, A.; Fukui, H. Possible Antitumor Promoters in *Spinacia Oleracea* (Spinach) and Comparison of Their Contents among Cultivars. *Biosci. Biotechnol. Biochem.* **2002**, *66* (2), 248–254. <https://doi.org/10.1271/bbb.66.248>.
2. (9) van Breemen, R. B.; Canjura, F. L.; Schwartz, S. J. Identification of Chlorophyll Derivatives by Mass Spectrometry. *J. Agric. Food Chem.* **1991**, *39* (8), 1452–1456. <https://doi.org/10.1021/jf00008a018>.
3. (10) Chen, K.; Ríos, J. J.; Pérez-Gálvez, A.; Roca, M. Comprehensive Chlorophyll Composition in the Main Edible Seaweeds. *Food Chem.* **2017**, *228* (August), 625–633. <https://doi.org/10.1016/j.foodchem.2017.02.036>.
4. (11) Bei, Y. 乳鼠心肌提取 HHS Public Access. *Physiol. Behav.* **2017**, *176* (3), 139–148. <https://doi.org/10.1016/j.ijms.2014.08.026>.
